# Supplementary material for: A Rational Analysis on Key Parameters Ruling Zerovalent Iron-Based Treatment Trains: Towards the Separation of Reductive from Oxidative Phases
Source: MDPI journal article supplement (doi:10.3390/nano11112948), 2021-11-03
Supplement: s1 [file s1]

## Supplementary Material

# A Rational Analysis on Key Parameters Ruling Zerovalent Iron-Based Treatment Trains: Towards the Separation of Reductive from Oxidative Phases

Iván Sciscenko <sup>1</sup>, Antonio Arques <sup>1</sup>, Carlos Escudero-Oñate <sup>2</sup>, Melina Roccamante <sup>3</sup>, Ana Ruiz-Delgado <sup>3,4</sup>, Sara Miralles-Cuevas <sup>5</sup>, Sixto Malato <sup>3,4</sup> and Isabel Oller <sup>3,4,\*</sup>

<sup>1</sup> Departamento de Ingeniería Textil y Papelera, Universitat Politècnica de València (UPV), Plaza Ferrándiz y Carbonell s/n, 03801 Alcoy, Spain; ivsci@txp.upv.es (I.S.); aarques@txp.upv.es (A.A.)

<sup>2</sup> Institute for Energy Technology (IFE), Instituttveien 18, 2007, Kjeller, 2007, Lillestrom, Norway; carlos.escudero@ife.no

<sup>3</sup> CIEMAT-Plataforma Solar de Almería, Carretera de Senés, km 4, 04200, Tabernas, Spain; mroccamante@psa.es (M.R.); anruiz@psa.es (A.R.-D.); smalato@psa.es (S.M.)

<sup>4</sup> CIESOL, Joint Centre of the University of Almería-CIEMAT, Ctra. Sacramento, s/n, La Cañada, 04120 Almería, Spain

<sup>5</sup> Programa Institucional de Fomento a la I+D+i, Universidad Tecnológica Metropolitana, Av. Ignacio Valdivieso 2409, 8940000, San Joaquín, Santiago, Chile; sara.miralles@psa.es

\* Correspondence: ioller@psa.es

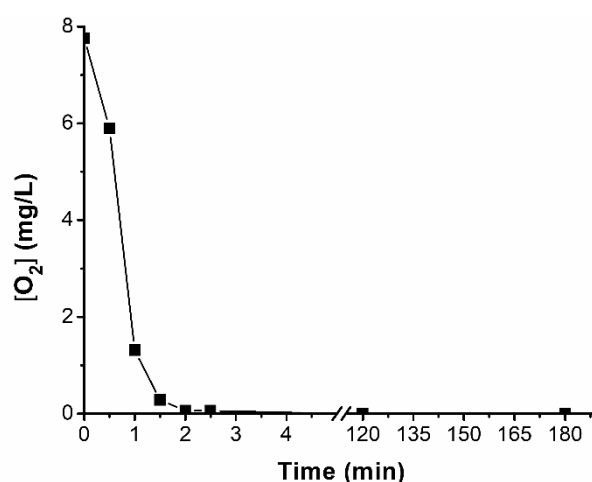

**Figure S1.** Dissolved oxygen concentration during PNBA 6  $\mu$ M reduction in NW with 1.4 g/L of mZVI at initial pH 3.0.

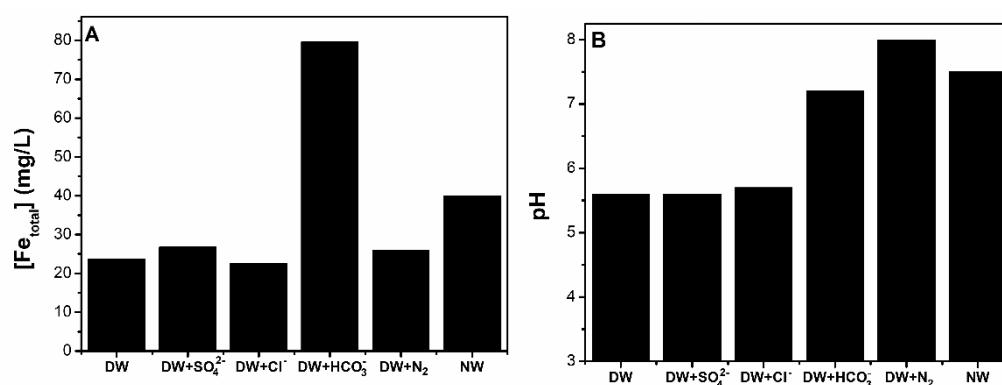

**Figure S2.** PNBA 6  $\mu\text{M}$  reduction at initial pH 3.0 with 1.4 g/L mZVI in different water matrices at 180 min: A) released Fe (measured as total and filtered) B) pH.

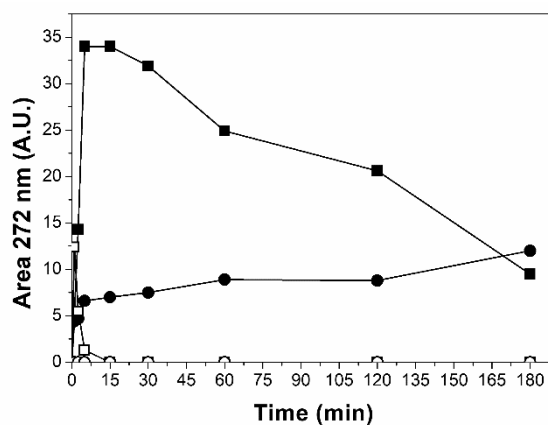

**Figure S3.** Kinetic formation of two unknown compounds, called X1 and X2, observed in the chromatograms during PNBA 6  $\mu\text{M}$  reduction with 1.4 g/L mZVI at initial pH 3.0 in DW under aerobic (■ and ● for X1 and X2, respectively) and anaerobic (□ and ○ for X1 and X2, respectively) conditions.

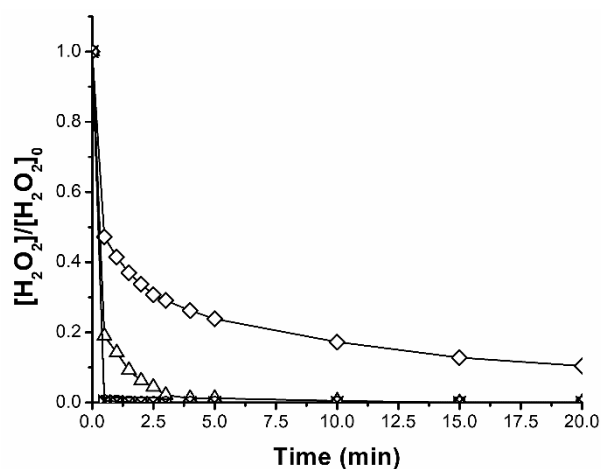

**Figure S4.**  $\text{H}_2\text{O}_2$  consumption during Fenton oxidation experiments, separating the mZVI previous different  $\text{H}_2\text{O}_2$  concentrations, 10 mg/L (○), 25 mg/L (△) and 50 mg/L (◇), as well as the one containing the mZVI 1.4 g/L with  $\text{H}_2\text{O}_2$  50 mg/L (⊕).

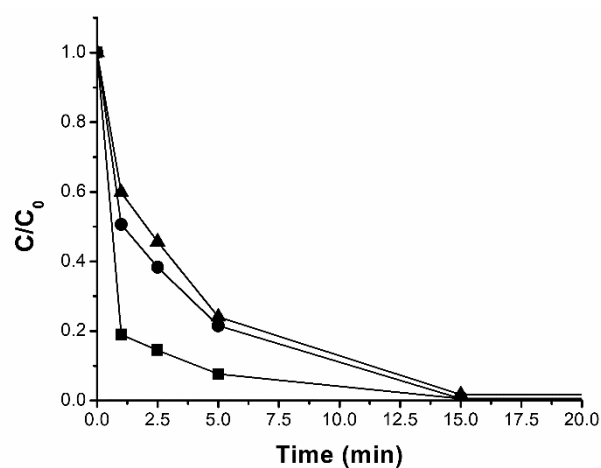

**Figure S5.** Fenton oxidation of the supernatant ( $[PABA] = 50 \mu\text{M}$ ,  $[\text{Fe}_{\text{total}}] = 55 \text{ mg/L}$ ,  $\text{pH} = 7.3$ ) with  $50 \text{ mg/L}$  of  $\text{H}_2\text{O}_2$ , and  $50 \mu\text{M}$  of PNBA (added). Theoretical PNBA degradation rate[1] has been also inserted in the graph. Symbol representation has been given by: ■ (PABA), ● (PNBA) and ▲ (theoretical PNBA degradation rate).

## References

1. Buxton, G.V.; Greenstock, C.L.; Helman, W.P.; Ross, A.B. Critical Review of rate constants for reactions of hydrated electrons, hydrogen atoms and hydroxyl radicals ( $\cdot\text{OH}/\cdot\text{O}-$ ) in Aqueous Solution. *J. Phys. Chem. Ref. Data* **1988**, *17*, 513–886, doi:10.1063/1.555805.
